# Supplementary material
Source: PubMed Central journal article supplement (PMC3416605)
Supplement: AEM.01457-12_zam999103571so1.pdf [file AEM.01457-12_zam999103571so1.pdf]

| <b>Locus</b>                                                                | <b>Annotation</b>                                                                                                                                                                                                           | <b>Gene</b>                                                                                    |             |
|-----------------------------------------------------------------------------|-----------------------------------------------------------------------------------------------------------------------------------------------------------------------------------------------------------------------------|------------------------------------------------------------------------------------------------|-------------|
| cronobactin                                                                 | iron-chelator utilization protein                                                                                                                                                                                           | <i>viuB</i>                                                                                    |             |
|                                                                             | Putative membrane protein                                                                                                                                                                                                   | <i>shiF</i>                                                                                    |             |
|                                                                             | Citrate:6-N-acetyl-6-N-hydroxy-L-lysine ligase, alpha subunit (EC 6.3.2.27), aerobactin biosynthesis protein lucA @ Siderophore synthetase superfamily, group A @ Siderophore synthetase large component, acetyltransferase | <i>iucA</i>                                                                                    |             |
|                                                                             | N6-hydroxylysine O-acetyltransferase (EC 2.3.1.102), aerobactin biosynthesis protein lucB @ Siderophore synthetase small component, acetyltransferase                                                                       | <i>iucB</i>                                                                                    |             |
|                                                                             | Citrate:6-N-acetyl-6-N-hydroxy-L-lysine ligase, alpha subunit (EC 6.3.2.27), aerobactin biosynthesis protein lucA @ Siderophore synthetase superfamily, group C @ Siderophore synthetase component, ligase                  | <i>iucC</i>                                                                                    |             |
|                                                                             | L-lysine 6-monooxygenase [NADPH] (EC 1.14.13.59), aerobactin biosynthesis protein lucD @ Siderophore biosynthesis protein, monooxygenase                                                                                    | <i>iucD</i>                                                                                    |             |
|                                                                             | Aerobactin siderophore receptor lutA/TonB-dependent siderophore receptor                                                                                                                                                    | <i>iutA</i>                                                                                    |             |
|                                                                             | 4'-phosphopantetheinyl transferase (EC 2.7.8.-)                                                                                                                                                                             | <i>entD</i>                                                                                    |             |
|                                                                             | TonB-dependent receptor; Outer membrane receptor for ferric enterobactin and colicins B, D                                                                                                                                  | <i>fepA</i>                                                                                    |             |
|                                                                             | Enterobactin esterase                                                                                                                                                                                                       | <i>fes</i>                                                                                     |             |
| enterobactin                                                                | FIG005032: Putative cytoplasmic protein YbdZ                                                                                                                                                                                | <i>ybdZ</i>                                                                                    |             |
|                                                                             | Enterobactin synthetase component F, serine activating enzyme (EC 2.7.7.-)                                                                                                                                                  | <i>entF</i>                                                                                    |             |
|                                                                             | Ferric enterobactin uptake protein FepE                                                                                                                                                                                     | <i>fepE</i>                                                                                    |             |
|                                                                             | Proofreading thioesterase in enterobactin biosynthesis EntH                                                                                                                                                                 | <i>entH</i>                                                                                    |             |
|                                                                             | 2,3-dihydro-2,3-dihydroxybenzoate dehydrogenase (EC 1.3.1.28)                                                                                                                                                               | <i>entA</i>                                                                                    |             |
|                                                                             | Isochorismatase (EC 3.3.2.1)/ Apo-aryl carrier domain of EntB                                                                                                                                                               | <i>entB</i>                                                                                    |             |
|                                                                             | 2,3-dihydroxybenzoate-AMP ligase (EC 2.7.7.58)                                                                                                                                                                              | <i>entE</i>                                                                                    |             |
|                                                                             | Isochorismate synthase (EC 5.4.4.2)                                                                                                                                                                                         | <i>entC</i>                                                                                    |             |
|                                                                             | Ferric enterobactin-binding periplasmic protein FepB (TC 3.A.1.14.2)                                                                                                                                                        | <i>fepB</i>                                                                                    |             |
|                                                                             | Enterobactin exporter EntS                                                                                                                                                                                                  | <i>entS</i>                                                                                    |             |
|                                                                             | Ferric enterobactin transport system permease protein FepD (TC 3.A.1.14.2)                                                                                                                                                  | <i>fepD</i>                                                                                    |             |
|                                                                             | Ferric enterobactin transport system permease protein FepG (TC 3.A.1.14.2)                                                                                                                                                  | <i>fepG</i>                                                                                    |             |
|                                                                             | Ferric enterobactin transport ATP-binding protein FepC (TC 3.A.1.14.2)                                                                                                                                                      | <i>fepC</i>                                                                                    |             |
|                                                                             | Fhu transporter                                                                                                                                                                                                             | Ferric hydroxamate outer membrane receptor FhuA                                                | <i>fhuA</i> |
|                                                                             |                                                                                                                                                                                                                             | Ferric hydroxamate ABC transporter (TC 3.A.1.14.3), ATP-binding protein FhuC                   | <i>fhuC</i> |
|                                                                             |                                                                                                                                                                                                                             | Ferric hydroxamate ABC transporter (TC 3.A.1.14.3), periplasmic substrate binding protein FhuD | <i>fhuD</i> |
| Ferric hydroxamate ABC transporter (TC 3.A.1.14.3), permease component FhuB |                                                                                                                                                                                                                             | <i>fhuB</i>                                                                                    |             |
| Eit transporter                                                             | ABC transporter (iron.B12.siderophore.hemin) , ATP-binding component                                                                                                                                                        | <i>eitC</i>                                                                                    |             |
|                                                                             | ABC transporter (iron.B12.siderophore.hemin) , permease component                                                                                                                                                           | <i>eitB</i>                                                                                    |             |
|                                                                             | ABC transporter (iron.B12.siderophore.hemin) , periplasmic substrate-binding component                                                                                                                                      | <i>eitA</i>                                                                                    |             |
|                                                                             | Transporter, MFS superfamily                                                                                                                                                                                                | <i>eitD</i>                                                                                    |             |
| ferric dictrate                                                             | Probable RNA polymerase sigma factor <i>fecl</i>                                                                                                                                                                            | <i>fecl</i>                                                                                    |             |
|                                                                             | heme uptake transmembrane sensor                                                                                                                                                                                            | <i>fecR</i>                                                                                    |             |
|                                                                             | Vibrio ferrin receptor PvuA                                                                                                                                                                                                 | <i>fecA</i>                                                                                    |             |
|                                                                             | Fe-bacillibactin uptake system FeuA, Fe-bacillibactin binding                                                                                                                                                               | <i>fecB</i>                                                                                    |             |
|                                                                             | Iron(III) dictrate transport system permease protein <i>fecC</i> (TC 3.A.1.14.1)                                                                                                                                            | <i>fecC</i>                                                                                    |             |

|                     |                                                                                                                        |             |
|---------------------|------------------------------------------------------------------------------------------------------------------------|-------------|
|                     | Fe-bacillibactin uptake system FeuB                                                                                    | <i>fecD</i> |
|                     | Fe-bacillibactin uptake system FeuD                                                                                    | <i>fecE</i> |
| Feo                 | Ferrous iron transport protein A                                                                                       | <i>feoA</i> |
|                     | Ferrous iron transport protein B                                                                                       | <i>feoB</i> |
|                     | Ferrous iron-sensing transcriptional regulator FeoC                                                                    | <i>feoC</i> |
| Efe                 | Ferrous iron transport permease EfeU                                                                                   | <i>efeU</i> |
|                     | Ferrous iron transport periplasmic protein EfeO, contains peptidase-M75 domain and (frequently) cupredoxin-like domain | <i>efeO</i> |
|                     | Ferrous iron transport peroxidase EfeB                                                                                 | <i>efeB</i> |
| Ferric reductase    | Ferric reductase (1.6.99.14)                                                                                           | <i>fhuF</i> |
| TonB receptors      | Ferrichrome-iron receptor                                                                                              | <i>fcuA</i> |
|                     | Ferrichrome-iron receptor                                                                                              | <i>fcT</i>  |
|                     | Probable tonB-dependent receptor <i>yncD</i> precursor                                                                 | <i>yncD</i> |
|                     | Outer membrane vitamin B12 receptor BtuB                                                                               | <i>btuB</i> |
|                     | Ferrichrome-iron receptor                                                                                              | <i>foxA</i> |
|                     | FhuE receptor precursor                                                                                                | <i>fhuE</i> |
|                     | Outer Membrane Siderophore Receptor, IroN                                                                              | <i>pfeA</i> |
| Heme-iron extractor | Predicted iron-dependent peroxidase, Dyp-type family                                                                   | <i>yfeX</i> |

<sup>a</sup>Locus tag, with start and stop positions, are shown according to GenBank Accessions CP000783.1 (chromosome) and CP000785.1 (plasmid pESA3).

<sup>b</sup>Locus tag, with start and stop positions, are shown according to GenBank Accessions FN543093.2 (chromosome) and FN543096.1 (plasmid pCTU1).

<sup>c</sup>First number denotes last four digits of contig ID, second and third number represent nucleotide position of start and stop codons, respectively.

| <b>Gene</b> | <b><i>C. dub. dublinensis</i><br/>LMG23823</b> | <b><i>C. dub. lactaridi</i> LMG23825</b> | <b><i>C. dub. lausanensis</i><br/>LMG23824</b> |
|-------------|------------------------------------------------|------------------------------------------|------------------------------------------------|
| <i>viuB</i> | 1705 24790 23900 <sup>c</sup>                  | 2159 982 1869                            | Not sequenced                                  |
| <i>shiF</i> | 1705 25755 24787                               | 2165 975 1166; 2159 1 985                | Not sequenced                                  |
| <i>iucA</i> | 1705 26134 27882                               | 2165 839 1; 2153 1 908                   | Not sequenced                                  |
| <i>iucB</i> | 1705 27875 28822                               | 2153 901 1848                            | Not sequenced                                  |
| <i>iucC</i> | 1705 28819 30564                               | 2153 1845 2806; 2179 1162 515            | Not sequenced                                  |
| <i>iucD</i> | 1705 30561 31883                               | 2179 518 1; 2183 1 366                   | Not sequenced                                  |
| <i>iutA</i> | 1705 31908 34103                               | 2183 391 776; 2141 1 1755                | Not sequenced                                  |
| <i>entD</i> | 1702 315855 315196                             | 2516 193172 193831                       | 4000 240536 241195                             |
| <i>fepA</i> | 1702318164 315891                              | 2516 190863 193136                       | 4000 238227 240500                             |
| <i>fes</i>  | 1702 318445 319674                             | 2516 190582 189353                       | 4000 237946 236717                             |
| <i>ybdZ</i> | 1702 319690 319911                             | 2516 189337 189116                       | 4000 236701 236480                             |
| <i>entF</i> | 1702 319913 323818                             | 2516 189114 185209                       | 4000 236475 232573                             |
| <i>fepE</i> | Not present                                    | 2497 212765 211836                       | Not present                                    |
| <i>entH</i> | 1695 321728 321333                             | 2504 7239 7634                           | 3984 146459 146854                             |
| <i>entA</i> | 1695 322499 321747                             | 2504 6468 7220                           | 3984 145688 146440                             |
| <i>entB</i> | 1695 323365 322496                             | 2504 5602 6471                           | 3984 144822 145691                             |
| <i>entE</i> | 1695 324979 323375                             | 2504 3988 5592                           | 3984 143208 144812                             |
| <i>entC</i> | 1695 326155 324989                             | 2504 2812 3978                           | 3984 142032 143198                             |
| <i>fepB</i> | 1695 326343 327302                             | 2504 2624 1665                           | 3984 141843 140884                             |
| <i>entS</i> | 1695 328573 327329                             | 2504 394 1638                            | 3984 139613 140857                             |
| <i>fepD</i> | 1695 328708 329688                             | 2504 286 1; 2139 8314 7592               | 3984 139505 138498                             |
| <i>fepG</i> | 1695 329712 330677                             | 2139 7595 6603                           | 3984 138501 137509                             |
| <i>fepC</i> | 1965 330674 331465                             | 2139 6606 5815                           | 3984 137512 136721                             |
| <i>fhuA</i> | 1700 480100 482298                             | 2519 57977 55800                         | 3982 60326 58134                               |
| <i>fhuC</i> | 1700 482345 483142                             | 2519 55753 54956                         | 3982 58000 57290                               |
| <i>fhuD</i> | 1700 483142 484038                             | 2519 54956 54060                         | 3982 57248 56394                               |
| <i>fhuB</i> | 1700 484035 486020                             | 2519 54063 52078                         | 3982 56397 54412                               |
| <i>eitC</i> | 1488 2882 2124                                 | 1488 2882 2124                           | Not sequenced                                  |
| <i>eitB</i> | 1488 3343 2879                                 | 1488 3857 2879                           | Not sequenced                                  |
| <i>eitA</i> | 1488 4925 3918                                 | 1488 4925 3918                           | Not sequenced                                  |
| <i>eitD</i> | 1488 5167 6008; 1491 1 353                     | 1488 5167 6008; 1491 1 353               | Not sequenced                                  |
| <i>fecl</i> | Not present                                    | Not present                              | Not present                                    |
| <i>fecR</i> | Not present                                    | Not present                              | Not present                                    |
| <i>fecA</i> | Not present                                    | Not present                              | Not present                                    |
| <i>fecB</i> | Not present                                    | Not present                              | Not present                                    |
| <i>fecC</i> | Not present                                    | Not present                              | Not present                                    |
| <i>fecD</i> | Not present                                    | Not present                              | Not present                                    |
| <i>fecE</i> | Not present                                    | Not present                              | Not present                                    |
| <i>feoA</i> | 1698 366650 366874                             | 2518 29102 29326                         | 4003 26405 26629                               |
| <i>feoB</i> | 1698 366895 369216                             | 2518 29347 31668                         | 4003 26650 28971                               |
| <i>feoC</i> | 1698 369216 369452                             | 2518 31668 31904                         | 4003 28971 29207                               |

|             |                    |                    |                              |
|-------------|--------------------|--------------------|------------------------------|
| <i>efeU</i> | 1702 714285 715115 | 2514 124245 123415 | 3997 362 1; 3996 61760 61288 |
| <i>efeO</i> | 1702 715172 716299 | 2514123358 122231  | 3996 61231 60104             |
| <i>efeB</i> | 1702 16305 17588   | 2514 122225 120942 | 3996 60098 58815             |
| <i>fhuF</i> | 1700 274968 274180 | 2520 57931 58719   | 3982 276324 277112           |
| <i>fcuA</i> | 1702 9049 6896     | 2516 493268 495421 | 4001 183157 185310           |
| <i>fcT</i>  | 1709 11677 9527    | 2510 79804 77654   | 3989 116968 114818           |
| <i>yncD</i> | 1709 207728 209845 | 2512 92400 94517   | 3969 7686 5662               |
| <i>btuB</i> | 1693 96025 97878   | 2524 5905 4136     | 3978 92856 94709             |
| <i>foxA</i> | 1696 32336 34513   | 2508 149806 147629 | 3986 210835 208658           |
| <i>fhuE</i> | 1702 793439 791292 | 2514 47729 49930   | 3995 135840 137987           |
| <i>pfeA</i> | 1708 86059 83870   | 2509 8146 5957     | 3989 3238 1049               |
| <i>yfeX</i> | 1695 303400 302498 | 2504 27477 28379   | 3984 165646 166548           |

| <b>Gene</b> | <b><i>C. universalis</i><br/>NCTC9529</b> | <b><i>C. malonaticus</i> LMG23826</b> | <b><i>C. muytjensii</i> ATCC51329</b> |
|-------------|-------------------------------------------|---------------------------------------|---------------------------------------|
| <i>viuB</i> | 5492 4386 5273                            | 4507 741 819; 4668 0 660              | Not present                           |
| <i>shiF</i> | 5492 3178 4389                            | 4498 1310 1766; 4507 1 744            | Not present                           |
| <i>iucA</i> | 5492 3042 1291                            | 4559 7641 7201                        | Not present                           |
| <i>iucB</i> | 5492 1298 351                             | 4559 7208 6261                        | Not present                           |
| <i>iucC</i> | 5491 43876 42503                          | 4559 6264 4519                        | Not present                           |
| <i>iucD</i> | 5491 42506 41184                          | 4559 4522 3200                        | Not present                           |
| <i>iutA</i> | 5491 41161 38966                          | 4559 3177 982                         | Not present                           |
| <i>entD</i> | 5498 317628 316960                        | 4692 107193 106489                    | 5427 164818 164321                    |
| <i>fepA</i> | 5498 319937 317664                        | 4692 109469 107196                    | 5427 167289 165016                    |
| <i>fes</i>  | 5498 320217 321461                        | 4692 109748 110992                    | 5427 167628 168800                    |
| <i>ybdZ</i> | 5498 321465 321686                        | 4692 110996 111217                    | 5427 168816 169037                    |
| <i>entF</i> | 5498 321688 325602                        | 4692 111219 115136                    | 5427 169039 172974                    |
| <i>fepE</i> | 5495 466954 468096                        | 4666 14668 13526                      | 5441 264226 263207                    |
| <i>entH</i> | 5500 152617 152222                        | 4662 314648 314253                    | 5439 156036 155623                    |
| <i>entA</i> | 5500 153388 152636                        | 4663 243 1; 4662 315161<br>314667     | 5439 156789 156037                    |
| <i>entB</i> | 5500 154254 153385                        | 4663 1079 210                         | 5439 157655 156786                    |
| <i>entE</i> | 5500 155868 154264                        | 4663 2693 1089                        | 5439 159269 157665                    |
| <i>entC</i> | 5500 157045 155879                        | 4663 3870 2704                        | 5439 160449 159280                    |
| <i>fepB</i> | 5500 157232 158191                        | 4663 4059 5018                        | 5439 160637 161596                    |
| <i>entS</i> | 5500 159461 158217                        | 4663 6288 5044                        | 5439 162831 161623                    |
| <i>fepD</i> | 5500 159617 160576                        | 4663 6447 7403                        | 5439 163026 163982                    |
| <i>fepG</i> | 5500160615 161565                         | 4663 7442 8392                        | 5439 164072 164971                    |
| <i>fepC</i> | 5500 161562 162353                        | 4663 8395 9180                        | 5439 164968 165759                    |
| <i>fhuA</i> | 5497 269699 271891                        | 4686 142371 144563                    | 5425 120288 122525                    |
| <i>fhuC</i> | 5497 271999 272736                        | 4686 144611 145408                    | 5425 122632 123369                    |
| <i>fhuD</i> | 5497 272730 273632                        | 4686 145408 146304                    | 5425 123411 124265                    |
| <i>fhuB</i> | 5497 273629 275614                        | 4686 145316 147659; 4687 1<br>582     | 5425 124307 126247                    |
| <i>eitC</i> | 5492 46043                                | 4671 2337 2793                        | Not present                           |
| <i>eitB</i> | 5492 45006 46046                          | 4671 1302 2340                        | Not present                           |
| <i>eitA</i> | 5492 43999 45006                          | 4671 199 1302                         | Not present                           |
| <i>eitD</i> | 5492 43692 42523                          | 4671 55 1; 4670 2592 1888             | Not present                           |
| <i>fecI</i> | Not present                               | Not present                           | Not present                           |
| <i>fecR</i> | Not present                               | Not present                           | Not present                           |
| <i>fecA</i> | Not present                               | Not present                           | Not present                           |
| <i>fecB</i> | Not present                               | Not present                           | Not present                           |
| <i>fecC</i> | Not present                               | Not present                           | Not present                           |

|             |                      |                    |                    |
|-------------|----------------------|--------------------|--------------------|
| <i>fecD</i> | Not present          | Not present        | Not present        |
| <i>fecE</i> | Not present          | Not present        | Not present        |
| <i>feoA</i> | 5494 615911 615687   | 4666 518379 518603 | 5420 110786 110562 |
| <i>feoB</i> | 5494 615660 613345   | 4666 518630 520945 | 5420 110541 108220 |
| <i>feoC</i> | 5494613345 613109    | 4666 520945 521181 | 5420 108220 107984 |
| <i>efeU</i> | 5499 354892 355722   | 4693 52208 53038   | 5429 23580 24410   |
| <i>efeO</i> | 5499 355778 356905   | 4693 53094 54221   | 5429 24466 25593   |
| <i>efeB</i> | 5499 356911 358194   | 4693 54227 55510   | 5429 25623 26882   |
| <i>fhuF</i> | 5497 64957 64169     | 4685 22801 22013   | 5424 35894 35106   |
| <i>fcuA</i> | Not present          | Not present        | 5426 15371 13197   |
| <i>fcT</i>  | Not present          | Not present        | 5434 1150 3207     |
| <i>yncD</i> | 5499 862268 860154   | 4653 34095 31978   | 5431 108237 106429 |
| <i>btuB</i> | 5494 91674 89818     | 4681 80819 82675   | 5416 101275 99197  |
| <i>foxA</i> | 5499 1169794 1171971 | 4657 88864 91041   | 5434 212350 214464 |
| <i>fhuE</i> | 5499 433586 431439   | 4694 4945 2798     | 5429 99208 97007   |
| <i>pfeA</i> | 5499 1078144 1080258 | 4657 2935 5124     | 5434 120200 122389 |
| <i>yfeX</i> | 5500 134251 133349   | 4662 295965 295063 | 5439 136976 136074 |

| Gene        | <i>C. sakazakii</i> 2151 | <i>C. sakazakii</i> ATCCBAA894 <sup>a</sup> | <i>C. turicensis</i> z3032 <sup>b</sup> |
|-------------|--------------------------|---------------------------------------------|-----------------------------------------|
| <i>viuB</i> | 7918 11338 10454         | ESA_pESA3p05545 117909<br>117025            | Ctu_1p01020 97461 96541                 |
| <i>shiF</i> | 7918 12546 11335         | ESA_pESA3p05546 119117<br>117906            | Ctu_1p01030 98636 97425                 |
| <i>iucA</i> | 7918 12682 14430         | ESA_pESA3p05547 119253<br>121001            | Ctu_1p01040 98772 100520                |
| <i>iucB</i> | 7918 14420 15370         | ESA_pESA3p05548120991<br>121941             | Ctu_1p01050 100582<br>101460            |
| <i>iucC</i> | 7918 15367 17112         | ESA_pESA3p05549 121938<br>123683            | Ctu_1p01060 101454<br>103202            |
| <i>iucD</i> | 7918 17109 18431         | ESA_pESA3p05550 123680<br>125002            | Ctu_1p01070 103196<br>104521            |
| <i>iutA</i> | 7918 18454 20649         | ESA_pESA3p05551 125070<br>127220            | Ctu_1p01080 104540<br>106741            |
| <i>entD</i> | 7925 1460532 1461236     | ESA_02731 2682887 2683591                   | CTU_12310 1295376<br>1294708            |
| <i>fepA</i> | 7925 1458256 1460529     | ESA_02730 2680443 2682884                   | CTU_12320 1297685<br>1295412            |
| <i>fes</i>  | 7925 1457975 1456731     | ESA_02729 2680330 2679086                   | CTU_12330 1297965<br>1299209            |
| <i>ybdZ</i> | 7925 1456727 1456506     | ESA_02728 2679082 2678861                   | CTU_12340 1299213<br>1299434            |
| <i>entF</i> | 7925 1456480 1452587     | ESA_02727 2678835 2674954                   | CTU_12350 1299403<br>1303350            |
| <i>fepE</i> | 7923 766692 767924       | ESA_00459 432125 433267                     | CTU_33980 3555403<br>3554270            |
| <i>entH</i> | 7924 235325 235720       | ESA_00800 776567 776980                     | CTU_30430 3173893<br>3173480            |
| <i>entA</i> | 7924 234554 235306       | ESA_00799 775814 776566                     | CTU_30440 3174742<br>3173894            |
| <i>entB</i> | 7924 233688 234557       | ESA_00798 774948 775817                     | CTU_30450 3175512<br>3174643            |
| <i>entE</i> | 7924232074 233678        | ESA_00797 773334 774938                     | CTU_30460 3177126<br>3175522            |
| <i>entC</i> | 7924 230897 232063       | ESA_00796 772157 773323                     | CTU_30470 3178303<br>3177137            |
| <i>fepB</i> | 7924 230709 229750       | ESA_00795 771970 771011                     | CTU_30480 3178535<br>3179449            |
| <i>entS</i> | 7924 228480 229724       | ESA_00794 769741 770985                     | CTU_30490 3180682<br>3179474            |
| <i>fepD</i> | 7924228333 227365        | ESA_00793 769606 768626                     | CTU_30500 3180826<br>3181833            |
| <i>fepG</i> | 7924 227290 226376       | ESA_00792 768629 767637                     | CTU_30510 3181830<br>3182822            |
| <i>fepC</i> | 7924 226373 225588       | ESA_00791 767640 766849                     | CTU_30520 3182711<br>3183610            |
| <i>fhuA</i> | 7925 1839229 1837037     | ESA_03190 3109219 3107027                   | CTU_07810 843379 845550                 |

|             |                      |                             |                              |
|-------------|----------------------|-----------------------------|------------------------------|
| <i>fhuC</i> | 7925 1836989 1836192 | ESA_03189 3107081 3106182   | CTU_07820 845478 846395      |
| <i>fhuD</i> | 7925 1836192 1835296 | ESA_03188 3106182 3105286   | CTU_07830 846389 847291      |
| <i>fhuB</i> | 7925 1835299 1833314 | ESA_03187 3105289 3103304   | CTU_07840 847354 849273      |
| <i>eitC</i> | 7917 9316 8558       | ESA_pESA3p05516 75701 74943 | Ctu_1p00600 46366 45608      |
| <i>eitB</i> | 7917 10353 9313      | ESA_pESA3p05517 76738 75698 | Ctu_1p00610 47403 46363      |
| <i>eitA</i> | 7917 11360 10353     | ESA_pESA3p05518 77751 76738 | Ctu_1p00620 48410 47403      |
| <i>eitD</i> | 7917 11600 12835     | ESA_pESA3p05519 77985 79220 | Ctu_1p00630 48651 49886      |
| <i>fecl</i> | 7922 60136 60657     | Not present                 | Not present                  |
| <i>fecR</i> | 7922 60654 61607     | Not present                 | Not present                  |
| <i>fecA</i> | 7922 61694 64018     | Not present                 | Not present                  |
| <i>fecB</i> | 7922 64063 64965     | Not present                 | Not present                  |
| <i>fecC</i> | 7922 64962 65960     | Not present                 | Not present                  |
| <i>fecD</i> | 7922 65957 66913     | Not present                 | Not present                  |
| <i>fecE</i> | 7922 66914 67681     | Not present                 | Not present                  |
| <i>feoA</i> | 7923 251808 251584   | ESA_04330 4299210 4298986   | CTU_39180 4065804<br>4066028 |
| <i>feoB</i> | 7923 251557 249242   | ESA_04329 4298959 4296644   | CTU_39190 4066025<br>4068370 |
| <i>feoC</i> | 7923 249242 249006   | ESA_04328 4296644 4296408   | CTU_39200 4068370<br>4068606 |
| <i>efeU</i> | 7925 1061555 1060725 | ESA_02352 2287885 2287055   | CTU_16020 1697222<br>1698052 |
| <i>efeO</i> | 7925 1060669 1059542 | ESA_02351 2287005 2285872   | CTU_16030 1698201<br>1699235 |
| <i>efeB</i> | 7925 1059536 1058253 | ESA_02350 2285866 2284583   | CTU_16040 1699310<br>1700524 |
| <i>fhuF</i> | 7925 2053255 2054043 | ESA_03387 3324542 3325252   | CTU_05820 627567 626863      |
| <i>fcuA</i> | Not present          | Not present                 | Not present                  |
| <i>fcT</i>  | Not present          | Not present                 | Not present                  |
| <i>yncD</i> | 7925 599832 601496   | ESA_01885 1817265 1819382   | CTU_21030 2209313<br>2207196 |
| <i>btuB</i> | 7920 4550 2697       | ESA_03800 3747030 3745165   | CTU_02010 212846 214894      |
| <i>foxA</i> | 7925 255840 253723   | ESA_01478 1422382 1420205   | CTU_24470 2568322<br>2570388 |
| <i>fhuE</i> | 7925 986886 989033   | ESA_02242 2177871 2180072   | CTU_16810 1776220<br>1774145 |
| <i>pfeA</i> | 7925 337462 335273   | ESA_01552 1504217 1502028   | CTU_23670 2477163<br>2479238 |
| <i>yfeX</i> | 7924 253775 254677   | ESA_00821 795033 795935     | CTU_30220 3155704<br>3154823 |
